# Supplementary material
Source: Royal Society of Chemistry journal article supplement (doi:10.1039/d6ma00417b)

## SUPPLEMENTARY MATERIAL

### Hierarchically structured mixed-linker HKUST-1 Metal Organic Frameworks as catalysts: One-pot synthesis of quinazolines

Anna Nowacka and Francesc X. Llabrés i Xamena

Instituto de Tecnología Química (ITQ), Consejo Superior de Investigaciones Científicas-Universitat Politècnica de València, 46022, Valencia, Spain. E-mail: [flabres@itq.upv.es](mailto:flabres@itq.upv.es); [anna.nowacka21@gmail.com](mailto:anna.nowacka21@gmail.com)

|                                                                                      |   |
|--------------------------------------------------------------------------------------|---|
| Sample compositions .....                                                            | 2 |
| Fig. S1. <sup>1</sup> H NMR of digested <b>HM-1</b> and <b>HM-2</b> .....            | 3 |
| Fig. S2. TGA and dTGA of samples <b>M-1</b> , <b>HM-1</b> and <b>HM-2</b> .....      | 3 |
| Fig. S3. FESEM images of samples <b>M-1</b> , <b>HM-1</b> and <b>HM-2</b> .....      | 4 |
| Table S1. Reaction scope.....                                                        | 5 |
| Fig. S4. Hot filtration test of <b>HM-2</b> .....                                    | 6 |
| Fig. S5. XRD pattern of fresh and used <b>HM-2</b> .....                             | 6 |
| Fig. S6. FTIR spectra of adsorbed CO (at 77 K) onto <b>M-1</b> and <b>HM-2</b> ..... | 7 |

### Sample compositions.

Results obtained from ICP (Cu) and Elemental analysis (C, H, N) of samples **M1**, **HM-1** and **HM-2**. The calculated values of Cu, C, H and N given in the Table below are based on the empirical formulas considering the measured BTC:OH-IP molar ratios determined from the  $^1\text{H}$  NMR spectra of the digested samples, and the Metal-to-Ligand ratios determined from TGA. According to FTIR spectroscopy of adsorbed CO at 77 K, the amount of  $\text{Cu}^+/\text{Cu}^{2+}$  mixed-valence sites is very low in all samples, so we assume that charge compensation upon OH-IP linkers incorporation into the lattice is mainly achieved through residual nitrate anions coming from the copper salt used in the synthesis. Therefore, the experimental data are adjusted to general formulas  $[\text{Cu}_3(\text{BTC})_x(\text{OH-IP})_y(\text{NO}_3)_z]$  (with  $x + y \leq 2$ ).

|      | Formula                                                                     | Cu   |      | C    |      | H    |      | N    |       |
|------|-----------------------------------------------------------------------------|------|------|------|------|------|------|------|-------|
|      |                                                                             | Calc | Exp  | Calc | Exp  | Calc | Exp  | Calc | Exp   |
| M1   | $[\text{Cu}_3(\text{BTC})_{1.94}]$                                          | 32.2 | 31.9 | 35.4 | 35.0 | 0.98 | 1.02 | 0.00 | 0.08* |
| HM-1 | $[\text{Cu}_3(\text{BTC})_{1.73}(\text{OH-IP})_{0.19}(\text{NO}_3)_{0.19}]$ | 32.0 | 31.8 | 34.5 | 34.4 | 1.00 | 1.04 | 0.45 | 0.47  |
| HM-2 | $[\text{Cu}_3(\text{BTC})_{1.54}(\text{OH-IP})_{0.27}(\text{NO}_3)_{0.27}]$ | 33.2 | 32.8 | 33.4 | 33.1 | 0.99 | 1.02 | 0.66 | 0.69  |

\* The N content of the samples can originate from both, nitrate anions (needed to compensate mixed-valence  $\text{Cu}^+/\text{Cu}^{2+}$  centers) and any residual DMF used in the syntheses.

**Figure S1.** Determination of the amounts of OH-IP substitution in **HM-1** and **HM-2** by  $^1\text{H}$  NMR spectroscopy of the solids previously digested in  $d_2\text{-H}_2\text{SO}_4$  in  $d_6\text{-DMSO}$ .

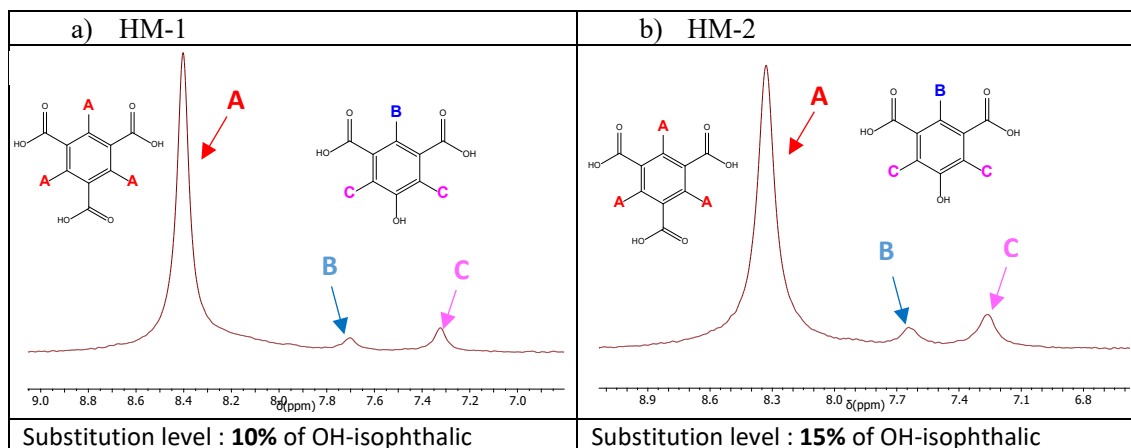

**Figure S2.** TGA curves (*left*) and first derivative (*right*) of samples **M-1**, **HM-1** and **HM-2**.

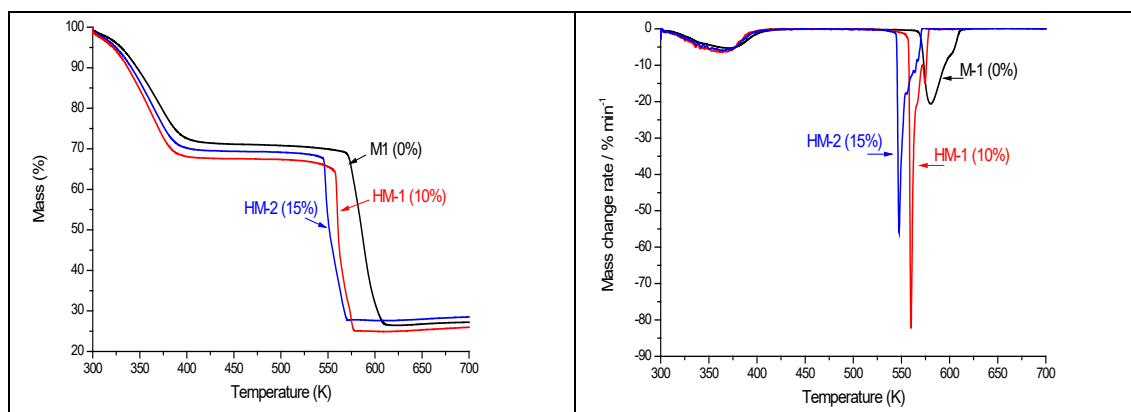

**Figure S3.** Representative FESEM images of (from *top* to *bottom*): **M-1**, **HM-1** and **HM-2**.

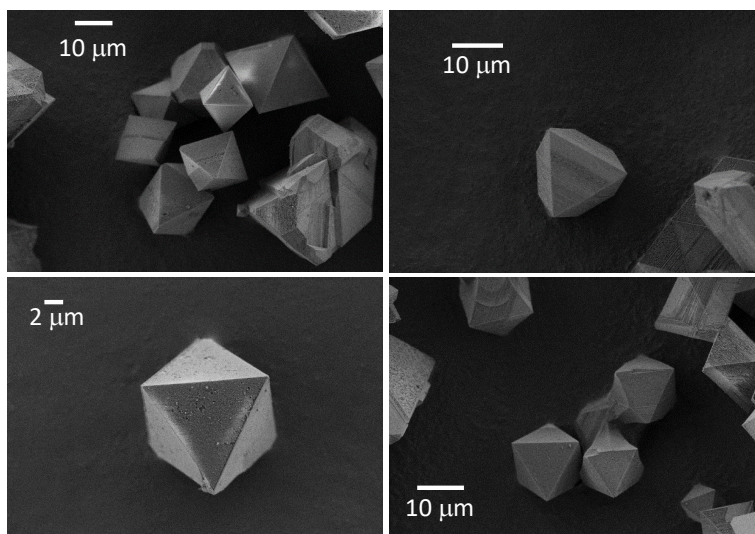

**M-1**

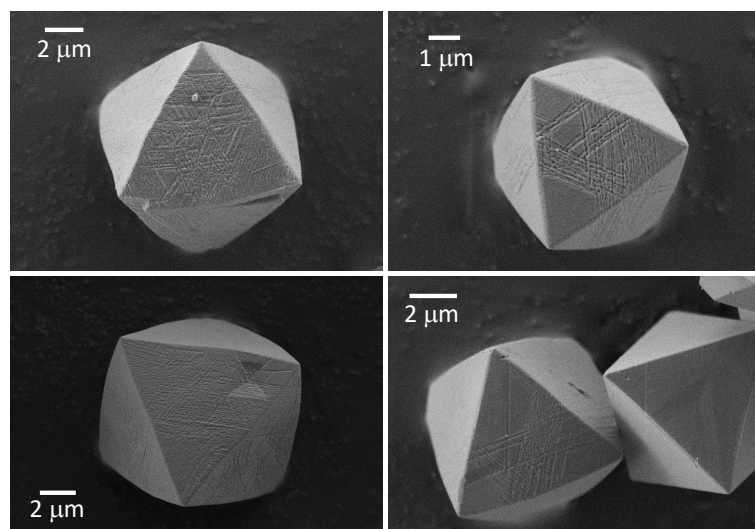

**HM-1**

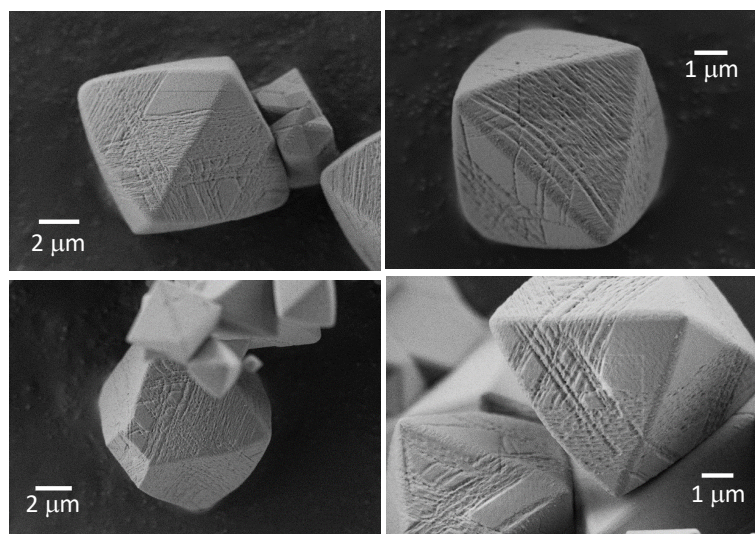

**HM-2**

**Table S1.** Scope of the one-pot synthesis of quinazolines (**3**) by oxidative coupling of 2-aminobenzoketones (**1**) and benzylamines (**2**)

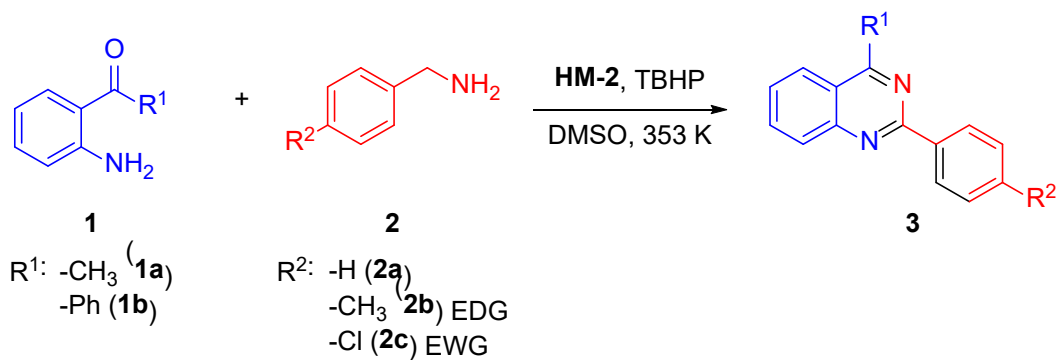

| Entry | 2-aminobenzoketone | Benzylamine | Quinazoline Product | Yield |     |
|-------|--------------------|-------------|---------------------|-------|-----|
|       |                    |             |                     | 1 h   | 5 h |
| 1     |                    |             |                     | 55    | 100 |
| 2     |                    |             |                     | 39    | 98  |
| 3     |                    |             |                     | 48    | 97  |
| 4     |                    |             |                     | 52    | 99  |

**Figure S4.** Hot filtration test of **HM-2** during the synthesis of quinazoline

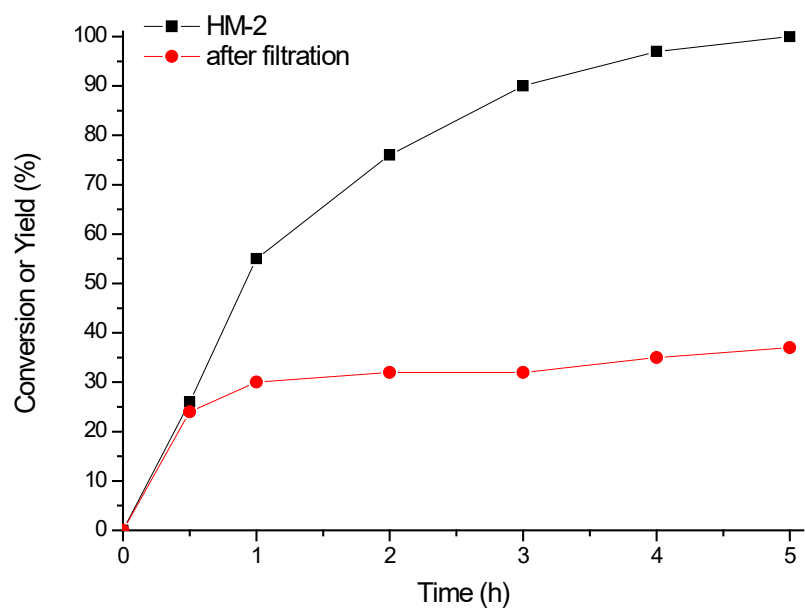

**Figure S5.** XRD pattern of fresh **HM-2** and the solid recovered after 4 catalytic cycles.

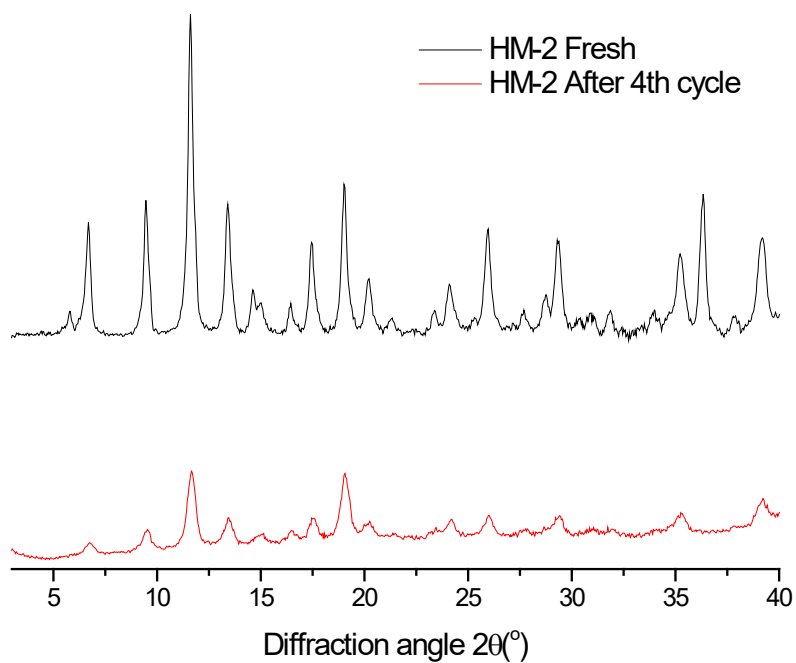

**Figure S6.** FTIR spectra of adsorbed CO at 77 K over **M-1** (*left*) and **HM-2** (*right*). For the sake of clarity, the spectra at higher equilibrium pressures of CO have been upward shifted to appreciate better the details at low CO doses (up to ca. 1 mbar)

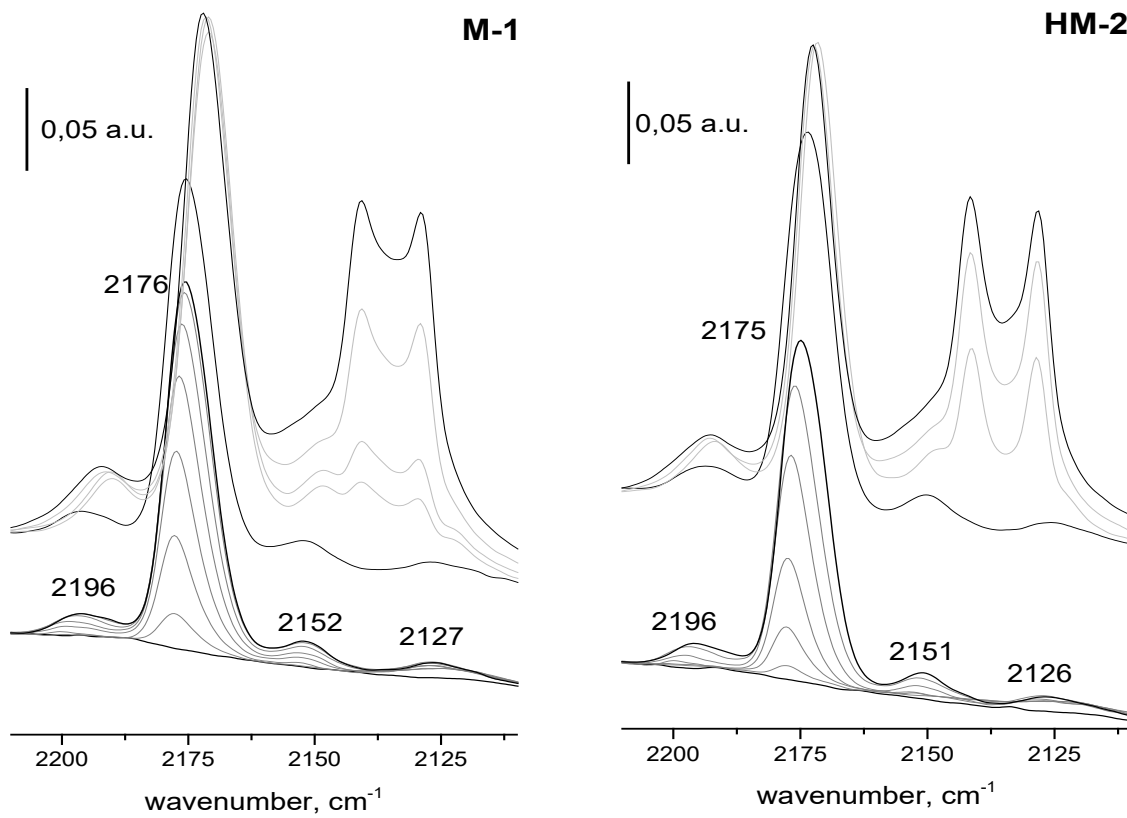

Supplement: d6ma00417b1.pdf [file d6ma00417b1.pdf]
